# Supplementary material
Source: PubMed Central journal article supplement (PMC3540941)
Supplement: neo1412_1153SD1.pdf [file neo1412_1153SD1.pdf]

**Table W1.** Primer Sequences.

| Gene                                                             | Primer Sequence or Catalog Number (for TaqMan Assays)                                                                                                                                                                                  |
|------------------------------------------------------------------|----------------------------------------------------------------------------------------------------------------------------------------------------------------------------------------------------------------------------------------|
| <i>qRT-PCR primer sequences</i>                                  |                                                                                                                                                                                                                                        |
| <i>CITED1</i>                                                    | Forward primer, 5'-AGGATGCCAACCAAGAGATG-3'<br>Reverse primer, 5'-TGGTTCCATTGAGGCTACC-3'                                                                                                                                                |
| <i>CXXC4</i>                                                     | Forward primer, 5'-CAACCCAGCCAAGAAGA-3'<br>Reverse primer, 5'-AGATCTGGTGTCCCGTTTG-3'                                                                                                                                                   |
| <i>DKK1</i>                                                      | Forward primer, 5'-TCCGAGGAGAAATTGAGGAA-3'<br>Reverse primer, 5'-CCACAGTAACAACGCTGGAA-3'                                                                                                                                               |
| <i>KREMEN1*</i>                                                  | Hs00230750_m1 (spans exons 2–3 junction)                                                                                                                                                                                               |
| <i>PCNA*</i>                                                     | Hs00427214_g1 (spans exons 3–4 junction)                                                                                                                                                                                               |
| <i>GAPDH*</i>                                                    | Hs9999905_m1 (spans exons 3–4 junction)                                                                                                                                                                                                |
| <i>cDNA sequencing primers for detection of CTNNB1 mutations</i> |                                                                                                                                                                                                                                        |
| <i>CTNNB1</i>                                                    | Forward primer (exons 2–4), 5'-AAAATCCAGCGTGACAATGG-3'<br>Reverse primer (exons 2–4), 5'-TGTGGCAAGTTCTGCATCATC-3'<br>Forward primer (exons 1–5), 5'-GGAGGAAGGTCTGAGGAGCAG-3'<br>Reverse primer (exons 1–5), 5'-CGATGATGGGAAGGTTATGC-3' |

\*TaqMan probe-based gene expression analysis assays from Applied Biosystems. Sequences are proprietary, but exon-exon boundaries to which primers and probe are designed are listed.

**Table W2a.** Gene List for Wnt Pathway RT<sup>2</sup> PCR Array.

| Position | Unigene   | Refseq       | Symbol   | Description                                           |
|----------|-----------|--------------|----------|-------------------------------------------------------|
| A01      | Hs.515053 | NM_001130    | AES      | Amino-terminal enhancer of split                      |
| A02      | Hs.158932 | NM_000038    | APC      | Adenomatous polyposis coli                            |
| A03      | Hs.592082 | NM_003502    | AXIN1    | Axin 1                                                |
| A04      | Hs.415209 | NM_004326    | BCL9     | B cell CLL/lymphoma 9                                 |
| A05      | Hs.643802 | NM_033637    | BTRC     | β-Transducin repeat containing                        |
| A06      | Hs.17631  | NM_003468    | FZD5     | Frizzled family receptor 5                            |
| A07      | Hs.523852 | NM_053056    | CCND1    | Cyclin D1                                             |
| A08      | Hs.376071 | NM_001759    | CCND2    | Cyclin D2                                             |
| A09      | Hs.534307 | NM_001760    | CCND3    | Cyclin D3                                             |
| A10      | Hs.529862 | NM_001892    | CSNK1A1  | Casein kinase 1, α1                                   |
| A11      | Hs.631725 | NM_001893    | CSNK1D   | Casein kinase 1, Δ                                    |
| A12      | Hs.646508 | NM_022048    | CSNK1G1  | Casein kinase 1, γ1                                   |
| B01      | Hs.644056 | NM_001895    | CSNK2A1  | Casein kinase 2, α1 polypeptide                       |
| B02      | Hs.208597 | NM_001328    | CTBP1    | C-terminal binding protein 1                          |
| B03      | Hs.501345 | NM_022802    | CTBP2    | C-terminal binding protein 2                          |
| B04      | Hs.476018 | NM_001904    | CTNNB1   | Catenin (cadherin-associated protein), β1, 88 kDa     |
| B05      | Hs.463759 | NM_020248    | CTNNBIP1 | Catenin, β interacting protein 1                      |
| B06      | Hs.12248  | NM_025212    | CXXC4    | CXXC4                                                 |
| B07      | Hs.654934 | NM_014992    | DAAM1    | Dishevelled associated activator of morphogenesis 1   |
| B08      | Hs.655626 | NM_033425    | DIXDC1   | DIX domain containing 1                               |
| B09      | Hs.40499  | NM_012242    | DKK1     | Dickkopf homolog 1 ( <i>Xenopus laevis</i> )          |
| B10      | Hs.74375  | NM_004421    | DVL1     | Dishevelled, dsh homolog 1 ( <i>Drosophila</i> )      |
| B11      | Hs.118640 | NM_004422    | DVL2     | Dishevelled, dsh homolog 2 ( <i>Drosophila</i> )      |
| B12      | Hs.517517 | NM_001429    | EP300    | E1A binding protein p300                              |
| C01      | Hs.484138 | NM_012300    | FBXW11   | F-box and WD repeat domain containing 11              |
| C02      | Hs.494985 | NM_012164    | FBXW2    | F-box and WD repeat domain containing 2               |
| C03      | Hs.1755   | NM_002007    | FGF4     | Fibroblast growth factor 4                            |
| C04      | Hs.283565 | NM_005438    | FOSL1    | FOS-like antigen 1                                    |
| C05      | Hs.663679 | NM_003593    | FOXN1    | Forkhead box N1                                       |
| C06      | Hs.126057 | NM_005479    | FRAT1    | Frequently rearranged in advanced T cell lymphomas    |
| C07      | Hs.128453 | NM_001463    | FRZB     | Frizzled-related protein                              |
| C08      | Hs.36975  | NM_000510    | FSHB     | Follicle stimulating hormone, β polypeptide           |
| C09      | Hs.94234  | NM_003505    | FZD1     | Frizzled family receptor 1                            |
| C10      | Hs.142912 | NM_001466    | FZD2     | Frizzled family receptor 2                            |
| C11      | Hs.40735  | NM_017412    | FZD3     | Frizzled family receptor 3                            |
| C12      | Hs.19545  | NM_012193    | FZD4     | Frizzled family receptor 4                            |
| D01      | Hs.591863 | NM_003506    | FZD6     | Frizzled family receptor 6                            |
| D02      | Hs.173859 | NM_003507    | FZD7     | Frizzled family receptor 7                            |
| D03      | Hs.302634 | NM_031866    | FZD8     | Frizzled family receptor 8                            |
| D04      | Hs.466828 | NM_019884    | GSK3A    | Glycogen synthase kinase 3α                           |
| D05      | Hs.445733 | NM_002093    | GSK3B    | Glycogen synthase kinase 3β                           |
| D06      | Hs.714791 | NM_002228    | JUN      | Jun proto-oncogene                                    |
| D07      | Hs.229335 | NM_001039570 | KREMEN1  | Kringle containing transmembrane protein 1            |
| D08      | Hs.555947 | NM_016269    | LEF1     | Lymphoid enhancer-binding factor 1                    |
| D09      | Hs.6347   | NM_002335    | LRP5     | Low density lipoprotein receptor-related protein 5    |
| D10      | Hs.584775 | NM_002336    | LRP6     | Low density lipoprotein receptor-related protein 6    |
| D11      | Hs.202453 | NM_002467    | MYC      | V-myc myelocytomatosis viral oncogene homolog (avian) |
| D12      | Hs.592059 | NM_033119    | NKD1     | Naked cuticle homolog 1 ( <i>Drosophila</i> )         |

Table W2a. (continued)

| Position | Unigene   | Refseq    | Symbol   | Description                                                               |
|----------|-----------|-----------|----------|---------------------------------------------------------------------------|
| E01      | Hs.208759 | NM_016231 | NLK      | Nemo-like kinase                                                          |
| E02      | Hs.643588 | NM_000325 | PITX2    | Paired-like homeodomain 2                                                 |
| E03      | Hs.386453 | NM_022825 | PORCN    | Porcupine homolog ( <i>Drosophila</i> )                                   |
| E04      | Hs.483408 | NM_002715 | PPP2CA   | Protein phosphatase 2, catalytic subunit, $\alpha$ isozyme                |
| E05      | Hs.467192 | NM_014225 | PPP2R1A  | Protein phosphatase 2, regulatory subunit A, $\alpha$                     |
| E06      | Hs.256587 | NM_015617 | PYGO1    | Pygopus homolog 1 ( <i>Drosophila</i> )                                   |
| E07      | Hs.647774 | NM_021205 | RHOU     | Ras homolog gene family, member U                                         |
| E08      | Hs.401388 | NM_021627 | SEN2     | SUMO1/sentrin/SMT3 specific peptidase 2                                   |
| E09      | Hs.713546 | NM_003012 | SFRP1    | Secreted frizzled-related protein 1                                       |
| E10      | Hs.658169 | NM_003014 | SFRP4    | Secreted frizzled-related protein 4                                       |
| E11      | Hs.500822 | NM_022039 | FBXW4    | F-box and WD repeat domain containing 4                                   |
| E12      | Hs.728760 | NM_004252 | SLC9A3R1 | Solute carrier family 9 (sodium/hydrogen exchanger), member 3 regulator 1 |
| F01      | Hs.98367  | NM_022454 | SOX17    | SRY (sex determining region Y)-box 17                                     |
| F02      | Hs.389457 | NM_003181 | T        | T, brachyury homolog (mouse)                                              |
| F03      | Hs.573153 | NM_003202 | TCF7     | Transcription factor 7 (T cell specific, HMG box)                         |
| F04      | Hs.516297 | NM_031283 | TCF7L1   | Transcription factor 7-like 1 (T cell-specific, HMG box)                  |
| F05      | Hs.197320 | NM_005077 | TLE1     | Transducin-like enhancer of split 1 (E(sp1) homolog, <i>Drosophila</i> )  |
| F06      | Hs.332173 | NM_003260 | TLE2     | Transducin-like enhancer of split 2 (E(sp1) homolog, <i>Drosophila</i> )  |
| F07      | Hs.284122 | NM_007191 | WIF1     | WNT inhibitory factor 1                                                   |
| F08      | Hs.492974 | NM_003882 | WISP1    | WNT1 inducible signaling pathway protein 1                                |
| F09      | Hs.248164 | NM_005430 | WNT1     | Wingless-type MMTV integration site family, member 1                      |
| F10      | Hs.121540 | NM_025216 | WNT10A   | Wingless-type MMTV integration site family, member 10A                    |
| F11      | Hs.108219 | NM_004626 | WNT11    | Wingless-type MMTV integration site family, member 11                     |
| F12      | Hs.272375 | NM_057168 | WNT16    | Wingless-type MMTV integration site family, member 16                     |
| G01      | Hs.567356 | NM_003391 | WNT2     | Wingless-type MMTV integration site family member 2                       |
| G02      | Hs.258575 | NM_004185 | WNT2B    | Wingless-type MMTV integration site family, member 2B                     |
| G03      | Hs.445884 | NM_030753 | WNT3     | Wingless-type MMTV integration site family, member 3                      |
| G04      | Hs.336930 | NM_033131 | WNT3A    | Wingless-type MMTV integration site family, member 3A                     |
| G05      | Hs.25766  | NM_030761 | WNT4     | Wingless-type MMTV integration site family, member 4                      |
| G06      | Hs.696364 | NM_003392 | WNT5A    | Wingless-type MMTV integration site family, member 5A                     |
| G07      | Hs.306051 | NM_032642 | WNT5B    | Wingless-type MMTV integration site family, member 5B                     |
| G08      | Hs.29764  | NM_006522 | WNT6     | Wingless-type MMTV integration site family, member 6                      |
| G09      | Hs.72290  | NM_004625 | WNT7A    | Wingless-type MMTV integration site family, member 7A                     |
| G10      | Hs.512714 | NM_058238 | WNT7B    | Wingless-type MMTV integration site family, member 7B                     |
| G11      | Hs.591274 | NM_058244 | WNT8A    | Wingless-type MMTV integration site family, member 8A                     |
| G12      | Hs.149504 | NM_003395 | WNT9A    | Wingless-type MMTV integration site family, member 9A                     |
| H01      | Hs.534255 | NM_004048 | B2M      | $\beta$ -2-microglobulin                                                  |
| H02      | Hs.412707 | NM_000194 | HPRT1    | Hypoxanthine phosphoribosyltransferase 1                                  |
| H03      | Hs.728776 | NM_012423 | RPL13A   | Ribosomal protein L13a                                                    |
| H04      | Hs.592355 | NM_002046 | GAPDH    | Glyceraldehyde-3-phosphate dehydrogenase                                  |
| H05      | Hs.520640 | NM_001101 | ACTB     | Actin, $\beta$                                                            |
| H06      | N/A       | SA_00105  | HGDC     | Human genomic DNA contamination                                           |
| H07      | N/A       | SA_00104  | RTC      | RT control                                                                |
| H08      | N/A       | SA_00104  | RTC      | RT control                                                                |
| H09      | N/A       | SA_00104  | RTC      | RT control                                                                |
| H10      | N/A       | SA_00103  | PPC      | Positive PCR control                                                      |
| H11      | N/A       | SA_00103  | PPC      | Positive PCR control                                                      |
| H12      | N/A       | SA_00103  | PPC      | Positive PCR control                                                      |

**Table W2b.** Average  $C_t$ .

|     |          | Average $C_t$ |         | SD            |          |
|-----|----------|---------------|---------|---------------|----------|
|     |          | Control Group | Group 1 | Control Group | Group 1  |
| A01 | AES      | 24.35         | 24.48   | 0.645497      | 0.320156 |
| A02 | APC      | 30.4          | 30.45   | 0.774597      | 0.911043 |
| A03 | AXIN1    | 25.43         | 26.28   | 0.464579      | 0.330404 |
| A04 | BCL9     | 26.88         | 27.38   | 0.780491      | 0.512348 |
| A05 | BTRC     | 26.88         | 26.43   | 0.727438      | 0.670199 |
| A06 | FZD5     | 23.85         | 23.65   | 0.675771      | 0.6245   |
| A07 | CCND1    | 24.98         | 25.4    | 0.556028      | 0.804156 |
| A08 | CCND2    | 34.88         | 34.25   | 0.25          | 0.818535 |
| A09 | CCND3    | 28.4          | 28.7    | 0.316228      | 0.547723 |
| A10 | CSNK1A1  | 23.7          | 23.38   | 1.089342      | 0.434933 |
| A11 | CSNK1D   | 23.15         | 23.35   | 0.718795      | 0.173205 |
| A12 | CSNK1G1  | 31.23         | 31.2    | 0.377492      | 0.812404 |
| B01 | CSNK2A1  | 23.65         | 23.85   | 0.443471      | 0.310913 |
| B02 | CTBP1    | 22.7          | 23.08   | 0.522813      | 0.457347 |
| B03 | CTBP2    | 28.75         | 28.88   | 0.932738      | 1.212092 |
| B04 | CTNNB1   | 22.13         | 22.28   | 0.639661      | 0.492443 |
| B05 | CTNNBIP1 | 27.58         | 28.53   | 1.212092      | 0.623832 |
| B06 | CXXC4    | 32.38         | 30.9    | 1.078193      | 0.616441 |
| B07 | DAAM1    | 25.45         | 25.93   | 1.008299      | 0.655108 |
| B08 | DIXDC1   | 27.03         | 27.48   | 0.644851      | 0.670199 |
| B09 | DKK1     | 20.75         | 21.65   | 0.81035       | 1.567376 |
| B10 | DVL1     | 24.9          | 24.75   | 0.571548      | 0.5      |
| B11 | DVL2     | 29.33         | 29.1    | 0.411299      | 0.469042 |
| B12 | EP300    | 24.95         | 24.9    | 0.925563      | 0.739369 |
| C01 | FBXW11   | 25.93         | 25.95   | 0.579511      | 0.288675 |
| C02 | FBXW2    | 28.7          | 28.8    | 0.503322      | 0.707107 |
| C03 | FGF4     | 35            | 35      | 0             | 0        |
| C04 | FOSL1    | 29.25         | 29.25   | 0.404145      | 0.412311 |
| C05 | FOXN1    | 33.7          | 34.78   | 1.536229      | 0.45     |
| C06 | FRAT1    | 28.75         | 28.65   | 0.785281      | 0.723418 |
| C07 | FRZB     | 28.13         | 31.2    | 1.007886      | 4.436215 |
| C08 | FSHB     | 34.93         | 35      | 0.15          | 0        |
| C09 | FZD1     | 30.3          | 30.1    | 0.909212      | 1.042433 |
| C10 | FZD2     | 35            | 35      | 0             | 0        |
| C11 | FZD3     | 27.48         | 27.53   | 0.85          | 0.221736 |
| C12 | FZD4     | 26.73         | 27.5    | 0.780491      | 0.983192 |
| D01 | FZD6     | 25.23         | 25.13   | 0.607591      | 0.442531 |
| D02 | FZD7     | 27.38         | 27.3    | 0.639661      | 0.469042 |
| D03 | FZD8     | 33.15         | 33.5    | 0.714143      | 0.57735  |
| D04 | GSK3A    | 25.78         | 26.08   | 0.464579      | 0.298608 |
| D05 | GSK3B    | 23.6          | 23.6    | 0.716473      | 0.559762 |
| D06 | JUN      | 26.4          | 26.35   | 0.752773      | 0.704746 |
| D07 | KREMEN1  | 28.73         | 28.1    | 0.531507      | 0.216025 |
| D08 | LEF1     | 25.23         | 25.43   | 0.499166      | 0.680074 |
| D09 | LRP5     | 25.68         | 25.93   | 0.330404      | 0.262996 |
| D10 | LRP6     | 24.75         | 24.68   | 0.750555      | 0.567891 |
| D11 | MYC      | 25.33         | 25.73   | 0.629153      | 0.30957  |
| D12 | NKD1     | 23.8          | 23.7    | 0.326599      | 0.469042 |

**Table W2b.** (continued)

|     |          | Average $C_t$ |         | SD            |          |
|-----|----------|---------------|---------|---------------|----------|
|     |          | Control Group | Group 1 | Control Group | Group 1  |
| E01 | NLK      | 26.3          | 26.2    | 0.668331      | 0.588784 |
| E02 | PITX2    | 28.1          | 27.83   | 0.983192      | 0.780491 |
| E03 | PORCN    | 27.9          | 28.18   | 0.559762      | 0.320156 |
| E04 | PPP2CA   | 26.7          | 26.83   | 0.432049      | 0.531507 |
| E05 | PPP2R1A  | 22.23         | 22.48   | 0.411299      | 0.320156 |
| E06 | PYGO1    | 28            | 28      | 0.535413      | 0.374166 |
| E07 | RHOU     | 23.78         | 24.18   | 0.537742      | 0.377492 |
| E08 | SENP2    | 25.2          | 25.48   | 0.496655      | 0.4272   |
| E09 | SFRP1    | 34.7          | 35      | 0.6           | 0        |
| E10 | SFRP4    | 29.83         | 30.58   | 0.914239      | 0.618466 |
| E11 | FBXW4    | 25.85         | 25.83   | 0.704746      | 0.585235 |
| E12 | SLC9A3R1 | 21.15         | 21.43   | 0.420317      | 0.35     |
| F01 | SOX17    | 35            | 35      | 0             | 0        |
| F02 | T        | 33.4          | 33.45   | 1.202775      | 0.619139 |
| F03 | TCF7     | 30.5          | 30.73   | 0.535413      | 0.377492 |
| F04 | TCF7L1   | 29.33         | 28.83   | 0.846069      | 0.287228 |
| F05 | TLE1     | 24.95         | 24.8    | 0.544671      | 0.648074 |
| F06 | TLE2     | 34.68         | 34.9    | 0.65          | 0.2      |
| F07 | WIF1     | 34.6          | 35      | 0.8           | 0        |
| F08 | WISP1    | 35            | 35      | 0             | 0        |
| F09 | WNT1     | 34.43         | 35      | 1.15          | 0        |
| F10 | WNT10A   | 32.65         | 33.53   | 2.977135      | 1.839157 |
| F11 | WNT11    | 30.58         | 32.03   | 0.411299      | 2.075853 |
| F12 | WNT16    | 34.2          | 33.75   | 1.28841       | 1.452584 |
| G01 | WNT2     | 35            | 35      | 0             | 0        |
| G02 | WNT2B    | 30.68         | 30.68   | 0.899537      | 1.652019 |
| G03 | WNT3     | 27.23         | 27.45   | 0.75          | 0.479583 |
| G04 | WNT3A    | 35            | 35      | 0             | 0        |
| G05 | WNT4     | 32.85         | 33.73   | 1.3           | 0.895824 |
| G06 | WNT5A    | 29.13         | 29.43   | 0.809835      | 0.537742 |
| G07 | WNT5B    | 34.73         | 35      | 0.377492      | 0        |
| G08 | WNT6     | 35            | 34.83   | 0             | 0.35     |
| G09 | WNT7A    | 35            | 35      | 0             | 0        |
| G10 | WNT7B    | 35            | 35      | 0             | 0        |
| G11 | WNT8A    | 35            | 34.95   | 0             | 0.1      |
| G12 | WNT9A    | 35            | 35      | 0             | 0        |
| H01 | B2M      | 21.05         | 21.55   | 0.519615      | 0.404145 |
| H02 | HPRT1    | 24.35         | 24.7    | 0.550757      | 0.637704 |
| H03 | RPL13A   | 19.73         | 19.55   | 0.55          | 0.369685 |
| H04 | GAPDH    | 16.58         | 16.65   | 0.660177      | 0.532291 |
| H05 | ACTB     | 19.13         | 18.95   | 0.655108      | 0.568624 |
| H06 | HGDC     | 35            | 35      | 0             | 0        |
| H07 | RTC      | 21.93         | 22.83   | 0.359398      | 0.330404 |
| H08 | RTC      | 22.43         | 23.4    | 0.368556      | 0.294392 |
| H09 | RTC      | 22.15         | 23.08   | 0.387298      | 0.499166 |
| H10 | PPC      | 18.65         | 19.23   | 0.493288      | 0.298608 |
| H11 | PPC      | 18.58         | 19.08   | 0.457347      | 0.330404 |
| H12 | PPC      | 18.3          | 18.78   | 0.391578      | 0.262996 |

Table W2c. Average  $\Delta C_t$ .

|     |          | Average $\Delta C_t$ [ $C_t$ (GOI) –<br>Average $C_t$ (HKG)] |           | SD            |          |
|-----|----------|--------------------------------------------------------------|-----------|---------------|----------|
|     |          | Control Group                                                | Group 1   | Control Group | Group 1  |
| A01 | AES      | 4.383333                                                     | 4.458333  | 0.551429      | 0.464579 |
| A02 | APC      | 10.433333                                                    | 10.433333 | 0.438009      | 0.514242 |
| A03 | AXIN1    | 5.458333                                                     | 6.258333  | 0.574376      | 0.512348 |
| A04 | BCL9     | 6.908333                                                     | 7.358333  | 0.448351      | 0.403113 |
| A05 | BTRC     | 6.908333                                                     | 6.408333  | 0.593405      | 0.481029 |
| A06 | FZD5     | 3.883333                                                     | 3.633333  | 0.475706      | 0.316228 |
| A07 | CCND1    | 5.008333                                                     | 5.383333  | 0.242479      | 0.404145 |
| A08 | CCND2    | 14.908333                                                    | 14.233333 | 0.460575      | 0.684755 |
| A09 | CCND3    | 8.433333                                                     | 8.683333  | 0.222777      | 0.31798  |
| A10 | CSNK1A1  | 3.733333                                                     | 3.358333  | 0.833111      | 0.485627 |
| A11 | CSNK1D   | 3.183333                                                     | 3.333333  | 0.439275      | 0.253859 |
| A12 | CSNK1G1  | 11.258333                                                    | 11.183333 | 0.260164      | 0.420317 |
| B01 | CSNK2A1  | 3.683333                                                     | 3.833333  | 0.244192      | 0.124722 |
| B02 | CTBP1    | 2.733333                                                     | 3.058333  | 0.479197      | 0.514512 |
| B03 | CTBP2    | 8.783333                                                     | 8.858333  | 0.684484      | 0.899537 |
| B04 | CTNNB1   | 2.158333                                                     | 2.258333  | 0.341429      | 0.452462 |
| B05 | CTNNBIP1 | 7.608333                                                     | 8.508333  | 1.0847        | 0.594652 |
| B06 | CXXC4    | 12.408333                                                    | 10.883333 | 0.869813      | 0.738617 |
| B07 | DAAM1    | 5.483333                                                     | 5.908333  | 0.654613      | 0.262996 |
| B08 | DIXDC1   | 7.058333                                                     | 7.458333  | 0.412198      | 0.492443 |
| B09 | DKK1     | 0.783333                                                     | 1.633333  | 0.630403      | 1.61314  |
| B10 | DVL1     | 4.933333                                                     | 4.733333  | 0.448041      | 0.221108 |
| B11 | DVL2     | 9.358333                                                     | 9.083333  | 0.21322       | 0.088192 |
| B12 | EP300    | 4.983333                                                     | 4.883333  | 0.684484      | 0.574456 |
| C01 | FBXW11   | 5.958333                                                     | 5.933333  | 0.490936      | 0.226078 |
| C02 | FBXW2    | 8.733333                                                     | 8.783333  | 0.136083      | 0.440959 |
| C03 | FGF4     | 15.033333                                                    | 14.983333 | 0.372181      | 0.412311 |
| C04 | FOSL1    | 9.283333                                                     | 9.233333  | 0.19341       | 0.377124 |
| C05 | FOXP1    | 13.733333                                                    | 14.758333 | 1.243948      | 0.471699 |
| C06 | FRAT1    | 8.783333                                                     | 8.633333  | 0.664719      | 0.694422 |
| C07 | FRZB     | 8.158333                                                     | 11.183333 | 0.678983      | 4.205948 |
| C08 | FSHB     | 14.958333                                                    | 14.983333 | 0.409494      | 0.412311 |
| C09 | FZD1     | 10.333333                                                    | 10.083333 | 0.822372      | 1.173314 |
| C10 | FZD2     | 15.033333                                                    | 14.983333 | 0.372181      | 0.412311 |
| C11 | FZD3     | 7.508333                                                     | 7.508333  | 0.578232      | 0.432371 |
| C12 | FZD4     | 6.758333                                                     | 7.483333  | 0.525903      | 0.635085 |
| D01 | FZD6     | 5.258333                                                     | 5.108333  | 0.438326      | 0.313138 |
| D02 | FZD7     | 7.408333                                                     | 7.283333  | 0.56462       | 0.552771 |
| D03 | FZD8     | 13.183333                                                    | 13.483333 | 1.027222      | 0.724952 |
| D04 | GSK3A    | 5.808333                                                     | 6.058333  | 0.247019      | 0.287228 |
| D05 | GSK3B    | 3.633333                                                     | 3.583333  | 0.445554      | 0.218581 |
| D06 | JUN      | 6.433333                                                     | 6.333333  | 0.476873      | 0.454606 |
| D07 | KREMEN1  | 8.758333                                                     | 8.083333  | 0.344668      | 0.338296 |
| D08 | LEF1     | 5.258333                                                     | 5.408333  | 0.27672       | 0.718215 |
| D09 | LRP5     | 5.708333                                                     | 5.908333  | 0.172938      | 0.195078 |
| D10 | LRP6     | 4.783333                                                     | 4.658333  | 0.482662      | 0.211476 |
| D11 | MYC      | 5.358333                                                     | 5.708333  | 0.568543      | 0.413991 |
| D12 | NKD1     | 3.833333                                                     | 3.683333  | 0.306715      | 0.247207 |

Table W2c. (continued)

|     |          | Average $\Delta C_t$ [ $C_t$ (GOI) –<br>Average $C_t$ (HKG)] |           | SD            |          |
|-----|----------|--------------------------------------------------------------|-----------|---------------|----------|
|     |          | Control Group                                                | Group 1   | Control Group | Group 1  |
| E01 | NLK      | 6.333333                                                     | 6.183333  | 0.52985       | 0.422953 |
| E02 | PITX2    | 8.133333                                                     | 7.808333  | 0.894841      | 0.822091 |
| E03 | PORCN    | 7.933333                                                     | 8.158333  | 0.552436      | 0.330404 |
| E04 | PPP2CA   | 6.733333                                                     | 6.808333  | 0.098131      | 0.183333 |
| E05 | PPP2R1A  | 2.258333                                                     | 2.458333  | 0.303529      | 0.397562 |
| E06 | PYGO1    | 8.033333                                                     | 7.983333  | 0.306715      | 0.310913 |
| E07 | RHOU     | 3.808333                                                     | 4.158333  | 0.378472      | 0.183333 |
| E08 | SEN2     | 5.233333                                                     | 5.458333  | 0.476873      | 0.254406 |
| E09 | SFRP1    | 14.733333                                                    | 14.983333 | 0.313877      | 0.412311 |
| E10 | SFRP4    | 9.858333                                                     | 10.558333 | 0.655673      | 0.206155 |
| E11 | FBXW4    | 5.883333                                                     | 5.808333  | 0.599691      | 0.476387 |
| E12 | SLC9A3R1 | 1.183333                                                     | 1.408333  | 0.270117      | 0.294863 |
| F01 | SOX17    | 15.033333                                                    | 14.983333 | 0.372181      | 0.412311 |
| F02 | T        | 13.433333                                                    | 13.433333 | 0.855483      | 0.507718 |
| F03 | TCF7     | 10.533333                                                    | 10.708333 | 0.320878      | 0.705731 |
| F04 | TCF7L1   | 9.358333                                                     | 8.808333  | 0.572438      | 0.236291 |
| F05 | TLE1     | 4.983333                                                     | 4.783333  | 0.345875      | 0.425572 |
| F06 | TLE2     | 14.708333                                                    | 14.883333 | 0.357331      | 0.378594 |
| F07 | WIF1     | 14.633333                                                    | 14.983333 | 0.495162      | 0.412311 |
| F08 | WISP1    | 15.033333                                                    | 14.983333 | 0.372181      | 0.412311 |
| F09 | WNT1     | 14.458333                                                    | 14.983333 | 0.833278      | 0.412311 |
| F10 | WNT10A   | 12.683333                                                    | 13.508333 | 2.646941      | 1.631717 |
| F11 | WNT11    | 10.608333                                                    | 12.008333 | 0.395694      | 1.678044 |
| F12 | WNT16    | 14.233333                                                    | 13.733333 | 1.015801      | 1.244544 |
| G01 | WNT2     | 15.033333                                                    | 14.983333 | 0.372181      | 0.412311 |
| G02 | WNT2B    | 10.708333                                                    | 10.658333 | 0.699934      | 1.279865 |
| G03 | WNT3     | 7.258333                                                     | 7.433333  | 0.606371      | 0.418994 |
| G04 | WNT3A    | 15.033333                                                    | 14.983333 | 0.372181      | 0.412311 |
| G05 | WNT4     | 12.883333                                                    | 13.708333 | 1.143905      | 0.820738 |
| G06 | WNT5A    | 9.158333                                                     | 9.408333  | 0.554694      | 0.305959 |
| G07 | WNT5B    | 14.758333                                                    | 14.983333 | 0.707827      | 0.412311 |
| G08 | WNT6     | 15.033333                                                    | 14.808333 | 0.372181      | 0.419325 |
| G09 | WNT7A    | 15.033333                                                    | 14.983333 | 0.372181      | 0.412311 |
| G10 | WNT7B    | 15.033333                                                    | 14.983333 | 0.372181      | 0.412311 |
| G11 | WNT8A    | 15.033333                                                    | 14.933333 | 0.372181      | 0.394405 |
| G12 | WNT9A    | 15.033333                                                    | 14.983333 | 0.372181      | 0.412311 |
| H01 | B2M      | 1.083333                                                     | 1.533333  | 0.402308      | 0.169967 |
| H02 | HPRT1    | 4.383333                                                     | 4.683333  | 0.361581      | 0.51099  |
| H03 | RPL13A   | -0.241667                                                    | -0.466667 | 0.242479      | 0.235702 |
| H04 | GAPDH    | -3.391667                                                    | -3.366667 | 0.29234       | 0.323179 |
| H05 | ACTB     | -0.841667                                                    | -1.066667 | 0.604535      | 0.169967 |
| H06 | HGDC     | 15.033333                                                    | 14.983333 | 0.372181      | 0.412311 |
| H07 | RTC      | 1.958333                                                     | 2.808333  | 0.602695      | 0.56001  |
| H08 | RTC      | 2.458333                                                     | 3.383333  | 0.598996      | 0.465475 |
| H09 | RTC      | 2.183333                                                     | 3.058333  | 0.586578      | 0.700991 |
| H10 | PPC      | -1.316667                                                    | -0.791667 | 0.355382      | 0.471699 |
| H11 | PPC      | -1.391667                                                    | -0.941667 | 0.21322       | 0.533594 |
| H12 | PPC      | -1.666667                                                    | -1.241667 | 0.237268      | 0.485627 |

**Table W2d.**  $2^{-\text{Average}(\Delta C_t)}$

|     |          | $2^{-\text{Average}(\Delta C_t)}$ |          |
|-----|----------|-----------------------------------|----------|
|     |          | Control Group                     | Group 1  |
| A01 | AES      | 0.047917                          | 0.045489 |
| A02 | APC      | 0.000723                          | 0.000723 |
| A03 | AXIN1    | 0.022745                          | 0.013063 |
| A04 | BCL9     | 0.008325                          | 0.006094 |
| A05 | BTRC     | 0.008325                          | 0.011773 |
| A06 | FZD5     | 0.067764                          | 0.080586 |
| A07 | CCND1    | 0.03107                           | 0.023958 |
| A08 | CCND2    | 0.000033                          | 0.000052 |
| A09 | CCND3    | 0.002893                          | 0.002433 |
| A10 | CSNK1A1  | 0.075189                          | 0.097508 |
| A11 | CSNK1D   | 0.110083                          | 0.099213 |
| A12 | CSNK1G1  | 0.000408                          | 0.00043  |
| B01 | CSNK2A1  | 0.077841                          | 0.070154 |
| B02 | CTBP1    | 0.150378                          | 0.120047 |
| B03 | CTBP2    | 0.00227                           | 0.002155 |
| B04 | CTNNB1   | 0.224015                          | 0.209013 |
| B05 | CTNNBIP1 | 0.005125                          | 0.002746 |
| B06 | CXXC4    | 0.000184                          | 0.000529 |
| B07 | DAAM1    | 0.022354                          | 0.01665  |
| B08 | DIXDC1   | 0.007503                          | 0.005686 |
| B09 | DKK1     | 0.581023                          | 0.322343 |
| B10 | DVL1     | 0.032728                          | 0.037595 |
| B11 | DVL2     | 0.001524                          | 0.001844 |
| B12 | EP300    | 0.031613                          | 0.033882 |
| C01 | FBXW11   | 0.016083                          | 0.016364 |
| C02 | FBXW2    | 0.00235                           | 0.00227  |
| C03 | FGF4     | 0.00003                           | 0.000031 |
| C04 | FOSL1    | 0.001605                          | 0.001661 |
| C05 | FOXN1    | 0.000073                          | 0.000036 |
| C06 | FRAT1    | 0.00227                           | 0.002518 |
| C07 | FRZB     | 0.0035                            | 0.00043  |
| C08 | FSHB     | 0.000031                          | 0.000031 |
| C09 | FZD1     | 0.000775                          | 0.000922 |
| C10 | FZD2     | 0.00003                           | 0.000031 |
| C11 | FZD3     | 0.005492                          | 0.005492 |
| C12 | FZD4     | 0.009237                          | 0.005588 |
| D01 | FZD6     | 0.026127                          | 0.028989 |
| D02 | FZD7     | 0.005887                          | 0.006419 |
| D03 | FZD8     | 0.000108                          | 0.000087 |
| D04 | GSK3A    | 0.017845                          | 0.015006 |
| D05 | GSK3B    | 0.080586                          | 0.083427 |
| D06 | JUN      | 0.011571                          | 0.012402 |
| D07 | KREMEN1  | 0.002309                          | 0.003687 |
| D08 | LEF1     | 0.026127                          | 0.023547 |
| D09 | LRP5     | 0.019126                          | 0.01665  |
| D10 | LRP6     | 0.036314                          | 0.039601 |
| D11 | MYC      | 0.024377                          | 0.019126 |
| D12 | NKD1     | 0.070154                          | 0.077841 |

**Table W2d.** (continued)

|     |          | $2^{-\text{Average}(\Delta C_t)}$ |           |
|-----|----------|-----------------------------------|-----------|
|     |          | Control Group                     | Group 1   |
| E01 | NLK      | 0.012402                          | 0.01376   |
| E02 | PITX2    | 0.003561                          | 0.004461  |
| E03 | PORCN    | 0.004091                          | 0.0035    |
| E04 | PPP2CA   | 0.009399                          | 0.008923  |
| E05 | PPP2R1A  | 0.209013                          | 0.181957  |
| E06 | PYGO1    | 0.003817                          | 0.003952  |
| E07 | RHO      | 0.07138                           | 0.056004  |
| E08 | SENP2    | 0.026583                          | 0.022745  |
| E09 | SFRP1    | 0.000037                          | 0.000031  |
| E10 | SFRP4    | 0.001077                          | 0.000663  |
| E11 | FBXW4    | 0.016941                          | 0.017845  |
| E12 | SLC9A3R1 | 0.440333                          | 0.376747  |
| F01 | SOX17    | 0.00003                           | 0.000031  |
| F02 | T        | 0.00009                           | 0.00009   |
| F03 | TCF7     | 0.000675                          | 0.000598  |
| F04 | TCF7L1   | 0.001524                          | 0.002231  |
| F05 | TLE1     | 0.031613                          | 0.036314  |
| F06 | TLE2     | 0.000037                          | 0.000033  |
| F07 | WIF1     | 0.000039                          | 0.000031  |
| F08 | WISP1    | 0.00003                           | 0.000031  |
| F09 | WNT1     | 0.000044                          | 0.000031  |
| F10 | WNT10A   | 0.000152                          | 0.000086  |
| F11 | WNT11    | 0.000641                          | 0.000243  |
| F12 | WNT16    | 0.000052                          | 0.000073  |
| G01 | WNT2     | 0.00003                           | 0.000031  |
| G02 | WNT2B    | 0.000598                          | 0.000619  |
| G03 | WNT3     | 0.006532                          | 0.005786  |
| G04 | WNT3A    | 0.00003                           | 0.000031  |
| G05 | WNT4     | 0.000132                          | 0.000075  |
| G06 | WNT5A    | 0.00175                           | 0.001472  |
| G07 | WNT5B    | 0.000036                          | 0.000031  |
| G08 | WNT6     | 0.00003                           | 0.000035  |
| G09 | WNT7A    | 0.00003                           | 0.000031  |
| G10 | WNT7B    | 0.00003                           | 0.000031  |
| G11 | WNT8A    | 0.00003                           | 0.000032  |
| G12 | WNT9A    | 0.00003                           | 0.000031  |
| H01 | B2M      | 0.471937                          | 0.345478  |
| H02 | HPRT1    | 0.047917                          | 0.03892   |
| H03 | RPL13A   | 1.182358                          | 1.381913  |
| H04 | GAPDH    | 10.495265                         | 10.314962 |
| H05 | ACTB     | 1.792119                          | 2.094588  |
| H06 | HGDC     | 0.00003                           | 0.000031  |
| H07 | RTC      | 0.257326                          | 0.14276   |
| H08 | RTC      | 0.181957                          | 0.095833  |
| H09 | RTC      | 0.220166                          | 0.120047  |
| H10 | PPC      | 2.490899                          | 1.731073  |
| H11 | PPC      | 2.623816                          | 1.920746  |
| H12 | PPC      | 3.174802                          | 2.364716  |

**Table W2e.** Fold Change.

|     |          | Fold Change (Compared to Control Group) |                 |          |
|-----|----------|-----------------------------------------|-----------------|----------|
|     |          | Group 1                                 |                 |          |
|     |          | Fold Change                             | 95% CI          | Comments |
| A01 | AES      | 0.9493                                  | (0.48, 1.41)    | Okay     |
| A02 | APC      | 1                                       | (0.54, 1.46)    | B        |
| A03 | AXIN1    | 0.5743                                  | (0.27, 0.87)    | Okay     |
| A04 | BCL9     | 0.732                                   | (0.43, 1.03)    | Okay     |
| A05 | BTRC     | 1.4142                                  | (0.68, 2.15)    | Okay     |
| A06 | FZD5     | 1.1892                                  | (0.73, 1.65)    | Okay     |
| A07 | CCND1    | 0.7711                                  | (0.52, 1.02)    | Okay     |
| A08 | CCND2    | 1.5966                                  | (0.70, 2.49)    | B        |
| A09 | CCND3    | 0.8409                                  | (0.62, 1.06)    | Okay     |
| A10 | CSNK1A1  | 1.2968                                  | (0.45, 2.15)    | Okay     |
| A11 | CSNK1D   | 0.9013                                  | (0.59, 1.21)    | Okay     |
| A12 | CSNK1G1  | 1.0534                                  | (0.70, 1.41)    | B        |
| B01 | CSNK2A1  | 0.9013                                  | (0.73, 1.07)    | Okay     |
| B02 | CTBP1    | 0.7983                                  | (0.42, 1.18)    | Okay     |
| B03 | CTBP2    | 0.9493                                  | (0.22, 1.68)    | Okay     |
| B04 | CTNNB1   | 0.933                                   | (0.57, 1.29)    | Okay     |
| B05 | CTNNBIP1 | 0.5359                                  | (0.09, 0.99)    | Okay     |
| B06 | CXCC4    | 2.8779                                  | (0.65, 5.11)    | Okay     |
| B07 | DAAM1    | 0.7448                                  | (0.39, 1.10)    | Okay     |
| B08 | DIXDC1   | 0.7579                                  | (0.43, 1.09)    | Okay     |
| B09 | DKK1     | 0.5548                                  | (0.00001, 1.21) | Okay     |
| B10 | DVL1     | 1.1487                                  | (0.76, 1.54)    | Okay     |
| B11 | DVL2     | 1.21                                    | (1.02, 1.40)    | Okay     |
| B12 | EP300    | 1.0718                                  | (0.42, 1.72)    | Okay     |
| C01 | FBXW11   | 1.0175                                  | (0.64, 1.39)    | Okay     |
| C02 | FBXW2    | 0.9659                                  | (0.66, 1.27)    | Okay     |
| C03 | FGF4     | 1.0353                                  | (0.64, 1.43)    | C        |
| C04 | FOSL1    | 1.0353                                  | (0.74, 1.33)    | Okay     |
| C05 | FOXM1    | 0.4914                                  | (0.05, 0.94)    | B        |
| C06 | FRAT1    | 1.1096                                  | (0.39, 1.83)    | Okay     |
| C07 | FRZB     | 0.1229                                  | (0.00001, 0.48) | A        |
| C08 | FSHB     | 0.9828                                  | (0.59, 1.37)    | B        |
| C09 | FZD1     | 1.1892                                  | (0.03, 2.35)    | B        |
| C10 | FZD2     | 1.0353                                  | (0.64, 1.43)    | C        |
| C11 | FZD3     | 1                                       | (0.51, 1.49)    | Okay     |
| C12 | FZD4     | 0.605                                   | (0.27, 0.94)    | Okay     |
| D01 | FZD6     | 1.1096                                  | (0.70, 1.52)    | Okay     |
| D02 | FZD7     | 1.0905                                  | (0.51, 1.68)    | Okay     |
| D03 | FZD8     | 0.8123                                  | (0.12, 1.51)    | B        |
| D04 | GSK3A    | 0.8409                                  | (0.62, 1.06)    | Okay     |
| D05 | GSK3B    | 1.0353                                  | (0.69, 1.38)    | Okay     |
| D06 | JUN      | 1.0718                                  | (0.59, 1.55)    | Okay     |
| D07 | KREMEN1  | 1.5966                                  | (1.07, 2.12)    | Okay     |
| D08 | LEF1     | 0.9013                                  | (0.43, 1.37)    | Okay     |
| D09 | LRP5     | 0.8706                                  | (0.72, 1.02)    | Okay     |
| D10 | LRP6     | 1.0905                                  | (0.70, 1.48)    | Okay     |
| D11 | MYC      | 0.7846                                  | (0.41, 1.16)    | Okay     |
| D12 | NKD1     | 1.1096                                  | (0.81, 1.41)    | Okay     |
| E01 | NLK      | 1.1096                                  | (0.60, 1.62)    | Okay     |
| E02 | PITX2    | 1.2527                                  | (0.22, 2.29)    | Okay     |
| E03 | PORCN    | 0.8556                                  | (0.48, 1.23)    | Okay     |
| E04 | PPP2CA   | 0.9493                                  | (0.82, 1.08)    | Okay     |
| E05 | PPP2R1A  | 0.8706                                  | (0.57, 1.17)    | Okay     |
| E06 | PYGO1    | 1.0353                                  | (0.73, 1.34)    | Okay     |
| E07 | RHOU     | 0.7846                                  | (0.56, 1.01)    | Okay     |
| E08 | SEN2     | 0.8556                                  | (0.54, 1.17)    | Okay     |
| E09 | SFRP1    | 0.8409                                  | (0.54, 1.14)    | B        |
| E10 | SFRP4    | 0.6156                                  | (0.33, 0.90)    | A        |
| E11 | FBXW4    | 1.0534                                  | (0.51, 1.60)    | Okay     |
| E12 | SLC9A3R1 | 0.8556                                  | (0.62, 1.09)    | Okay     |
| F01 | SOX17    | 1.0353                                  | (0.64, 1.43)    | C        |

**Table W2e.** (continued)

|     |        | Fold Change (Compared to Control Group) |                 |          |
|-----|--------|-----------------------------------------|-----------------|----------|
|     |        | Group 1                                 |                 |          |
|     |        | Fold Change                             | 95% CI          | Comments |
| F02 | T      | 1                                       | (0.32, 1.68)    | B        |
| F03 | TCF7   | 0.8858                                  | (0.42, 1.35)    | B        |
| F04 | TCF7L1 | 1.4641                                  | (0.85, 2.08)    | Okay     |
| F05 | TLE1   | 1.1487                                  | (0.72, 1.58)    | Okay     |
| F06 | TLE2   | 0.8858                                  | (0.57, 1.20)    | B        |
| F07 | WIF1   | 0.7846                                  | (0.44, 1.13)    | B        |
| F08 | WISP1  | 1.0353                                  | (0.64, 1.43)    | C        |
| F09 | WNT1   | 0.695                                   | (0.26, 1.13)    | B        |
| F10 | WNT10A | 0.5645                                  | (0.00001, 1.76) | B        |
| F11 | WNT11  | 0.3789                                  | (0.00001, 0.82) | B        |
| F12 | WNT16  | 1.4142                                  | (0.00001, 2.96) | B        |
| G01 | WNT2   | 1.0353                                  | (0.64, 1.43)    | C        |
| G02 | WNT2B  | 1.0353                                  | (0.01, 2.06)    | B        |
| G03 | WNT3   | 0.8858                                  | (0.44, 1.33)    | Okay     |
| G04 | WNT3A  | 1.0353                                  | (0.64, 1.43)    | C        |
| G05 | WNT4   | 0.5645                                  | (0.02, 1.10)    | B        |
| G06 | WNT5A  | 0.8409                                  | (0.48, 1.20)    | Okay     |
| G07 | WNT5B  | 0.8556                                  | (0.38, 1.33)    | B        |
| G08 | WNT6   | 1.1688                                  | (0.72, 1.61)    | B        |
| G09 | WNT7A  | 1.0353                                  | (0.64, 1.43)    | C        |
| G10 | WNT7B  | 1.0353                                  | (0.64, 1.43)    | C        |
| G11 | WNT8A  | 1.0718                                  | (0.68, 1.47)    | B        |
| G12 | WNT9A  | 1.0353                                  | (0.64, 1.43)    | C        |
| H01 | B2M    | 0.732                                   | (0.51, 0.95)    | Okay     |
| H02 | HPRT1  | 0.8123                                  | (0.47, 1.16)    | Okay     |
| H03 | RPL13A | 1.1688                                  | (0.90, 1.44)    | Okay     |
| H04 | GAPDH  | 0.9828                                  | (0.69, 1.27)    | Okay     |
| H05 | ACTB   | 1.1688                                  | (0.67, 1.67)    | Okay     |
| H06 | HGDC   | 1.0353                                  | (0.64, 1.43)    | C        |
| H07 | RTC    | 0.5548                                  | (0.24, 0.86)    | Okay     |
| H08 | RTC    | 0.5267                                  | (0.26, 0.80)    | Okay     |
| H09 | RTC    | 0.5453                                  | (0.21, 0.88)    | Okay     |
| H10 | PPC    | 0.695                                   | (0.42, 0.97)    | Okay     |
| H11 | PPC    | 0.732                                   | (0.45, 1.02)    | Okay     |
| H12 | PPC    | 0.7448                                  | (0.47, 1.02)    | Okay     |

**Comments:**

A: This gene's average threshold cycle is relatively high (>30) in either the control or the test sample and is reasonably low in the other sample (<30).

These data mean that the gene's expression is relatively low in one sample and reasonably detected in the other sample, suggesting that the actual fold-change value is at least as large as the calculated and reported fold-change result.

This fold-change result may also have greater variations if  $P > .05$ ; therefore, it is important to have a sufficient number of biologic replicates to validate the result for this gene.

B: This gene's average threshold cycle is relatively high (>30), meaning that its relative expression level is low, in both control and test samples, and the  $P$  value for the fold change is either unavailable or relatively high ( $P > .05$ ).

This fold-change result may also have greater variations; therefore, it is important to have a sufficient number of biologic replicates to validate the result for this gene.

C: This gene's average threshold cycle is either not determined or greater than the defined cutoff value (default 35), in both samples meaning that its expression was undetected, making this fold-change result erroneous and uninterpretable.

**Fold change and fold regulation:**

Fold change ( $2^{-\Delta\Delta C_t}$ ) is the normalized gene expression ( $2^{-\Delta C_t}$ ) in the test sample divided by the normalized gene expression ( $2^{-\Delta C_t}$ ) in the control sample.

Fold regulation represents fold-change results in a biologically meaningful way. Fold-change values greater than 1 indicate a positive or an up-regulation, and the fold regulation is equal to the fold change.

Fold-change values less than 1 indicate a negative or down-regulation, and the fold regulation is the negative inverse of the fold change.

Fold-change and fold-regulation values greater than 2 are indicated in red; fold-change values less than 0.5 and fold-regulation values less than -2 are indicated in blue.

Table W2f. *P* values.

|     |          | <i>P</i> Value (Compared to Control Group) |
|-----|----------|--------------------------------------------|
|     |          | Group 1                                    |
| A01 | AES      | 0.792341                                   |
| A02 | APC      | 0.965095                                   |
| A03 | AXIN1    | 0.125466                                   |
| A04 | BCL9     | 0.200823                                   |
| A05 | BTRC     | 0.198872                                   |
| A06 | FZD5     | 0.434184                                   |
| A07 | CCND1    | 0.1434                                     |
| A08 | CCND2    | 0.130908                                   |
| A09 | CCND3    | 0.26405                                    |
| A10 | CSNK1A1  | 0.581515                                   |
| A11 | CSNK1D   | 0.502102                                   |
| A12 | CSNK1G1  | 0.690156                                   |
| B01 | CSNK2A1  | 0.294784                                   |
| B02 | CTBP1    | 0.379823                                   |
| B03 | CTBP2    | 0.96217                                    |
| B04 | CTNNB1   | 0.757378                                   |
| B05 | CTNNBIP1 | 0.138199                                   |
| B06 | CXXC4    | 0.043045                                   |
| B07 | DAAM1    | 0.294942                                   |
| B08 | DIXDC1   | 0.291973                                   |
| B09 | DKK1     | 0.746279                                   |
| B10 | DVL1     | 0.490117                                   |
| B11 | DVL2     | 0.042473                                   |
| B12 | EP300    | 0.888903                                   |
| C01 | FBXW11   | 0.941277                                   |
| C02 | FBXW2    | 0.995686                                   |
| C03 | FGF4     | 0.836286                                   |
| C04 | FOSL1    | 0.714447                                   |
| C05 | FOXN1    | 0.156795                                   |
| C06 | FRAT1    | 0.689437                                   |
| C07 | FRZB     | 0.76046                                    |
| C08 | FSHB     | 0.954679                                   |
| C09 | FZD1     | 0.515336                                   |
| C10 | FZD2     | 0.836286                                   |
| C11 | FZD3     | 0.922969                                   |
| C12 | FZD4     | 0.135681                                   |
| D01 | FZD6     | 0.652247                                   |
| D02 | FZD7     | 0.769613                                   |
| D03 | FZD8     | 0.548591                                   |
| D04 | GSK3A    | 0.225384                                   |
| D05 | GSK3B    | 0.967886                                   |
| D06 | JUN      | 0.790172                                   |
| D07 | KREMEN1  | 0.033755                                   |
| D08 | LEF1     | 0.90179                                    |
| D09 | LRP5     | 0.181439                                   |
| D10 | LRP6     | 0.780073                                   |
| D11 | MYC      | 0.292486                                   |
| D12 | NKD1     | 0.506295                                   |
| E01 | NLK      | 0.693875                                   |
| E02 | PITX2    | 0.718265                                   |

Table W2f. (continued)

|     |          | <i>P</i> Value (Compared to Control Group) |
|-----|----------|--------------------------------------------|
|     |          | Group 1                                    |
| E03 | PORCN    | 0.416707                                   |
| E04 | PPP2CA   | 0.535224                                   |
| E05 | PPP2R1A  | 0.475922                                   |
| E06 | PYGO1    | 0.833288                                   |
| E07 | RHOA     | 0.114162                                   |
| E08 | SENP2    | 0.356227                                   |
| E09 | SFRP1    | 0.441863                                   |
| E10 | SFRP4    | 0.119764                                   |
| E11 | FBXW4    | 0.886316                                   |
| E12 | SLC9A3R1 | 0.288113                                   |
| F01 | SOX17    | 0.836286                                   |
| F02 | T        | 0.836247                                   |
| F03 | TCF7     | 0.879469                                   |
| F04 | TCF7L1   | 0.126211                                   |
| F05 | TLE1     | 0.461623                                   |
| F06 | TLE2     | 0.558308                                   |
| F07 | WIF1     | 0.357022                                   |
| F08 | WISP1    | 0.836286                                   |
| F09 | WNT1     | 0.333883                                   |
| F10 | WNT10A   | 0.398512                                   |
| F11 | WNT11    | 0.104759                                   |
| F12 | WNT16    | 0.495047                                   |
| G01 | WNT2     | 0.836286                                   |
| G02 | WNT2B    | 0.690109                                   |
| G03 | WNT3     | 0.545446                                   |
| G04 | WNT3A    | 0.836286                                   |
| G05 | WNT4     | 0.151461                                   |
| G06 | WNT5A    | 0.380818                                   |
| G07 | WNT5B    | 0.526959                                   |
| G08 | WNT6     | 0.428128                                   |
| G09 | WNT7A    | 0.836286                                   |
| G10 | WNT7B    | 0.836286                                   |
| G11 | WNT8A    | 0.713394                                   |
| G12 | WNT9A    | 0.836286                                   |
| H01 | B2M      | 0.07127                                    |
| H02 | HPRT1    | 0.439236                                   |
| H03 | RPL13A   | 0.214986                                   |
| H04 | GAPDH    | 0.937356                                   |
| H05 | ACTB     | 0.727042                                   |
| H06 | HGDC     | 0.836286                                   |
| H07 | RTC      | 0.102875                                   |
| H08 | RTC      | 0.089411                                   |
| H09 | RTC      | 0.115337                                   |
| H10 | PPC      | 0.124293                                   |
| H11 | PPC      | 0.171647                                   |
| H12 | PPC      | 0.184196                                   |

*P* value:

The *P* values are calculated based on a Student's *t* test of the replicate  $2^{-\Delta C_t}$  values for each gene in the control group and treatment groups, and *P* values less than .05 are indicated in red.



**Table W2g.** Fold Regulation.

|     |          | Up-regulation/Down-regulation<br>(Compared to Control Group) |          |
|-----|----------|--------------------------------------------------------------|----------|
|     |          | Group 1                                                      |          |
|     |          | Fold Regulation                                              | Comments |
| A01 | AES      | -1.0534                                                      | Okay     |
| A02 | APC      | 1                                                            | B        |
| A03 | AXIN1    | -1.7411                                                      | Okay     |
| A04 | BCL9     | -1.366                                                       | Okay     |
| A05 | BTRC     | 1.4142                                                       | Okay     |
| A06 | FZD5     | 1.1892                                                       | Okay     |
| A07 | CCND1    | -1.2968                                                      | Okay     |
| A08 | CCND2    | 1.5966                                                       | B        |
| A09 | CCND3    | -1.1892                                                      | Okay     |
| A10 | CSNK1A1  | 1.2968                                                       | Okay     |
| A11 | CSNK1D   | -1.1096                                                      | Okay     |
| A12 | CSNK1G1  | 1.0534                                                       | B        |
| B01 | CSNK2A1  | -1.1096                                                      | Okay     |
| B02 | CTBP1    | -1.2527                                                      | Okay     |
| B03 | CTBP2    | -1.0534                                                      | Okay     |
| B04 | CTNNB1   | -1.0718                                                      | Okay     |
| B05 | CTNNBIP1 | -1.8661                                                      | Okay     |
| B06 | CXXC4    | 2.8779                                                       | Okay     |
| B07 | DAAM1    | -1.3426                                                      | Okay     |
| B08 | DIXDC1   | -1.3195                                                      | Okay     |
| B09 | DKK1     | -1.8025                                                      | Okay     |
| B10 | DVL1     | 1.1487                                                       | Okay     |
| B11 | DVL2     | 1.21                                                         | Okay     |
| B12 | EP300    | 1.0718                                                       | Okay     |
| C01 | FBXW11   | 1.0175                                                       | Okay     |
| C02 | FBXW2    | -1.0353                                                      | Okay     |
| C03 | FGF4     | 1.0353                                                       | C        |
| C04 | FOSL1    | 1.0353                                                       | Okay     |
| C05 | FOXP1    | -2.035                                                       | B        |
| C06 | FRAT1    | 1.1096                                                       | Okay     |
| C07 | FRZB     | -8.1398                                                      | A        |
| C08 | FSHB     | -1.0175                                                      | B        |
| C09 | FZD1     | 1.1892                                                       | B        |
| C10 | FZD2     | 1.0353                                                       | C        |
| C11 | FZD3     | 1                                                            | Okay     |
| C12 | FZD4     | -1.6529                                                      | Okay     |
| D01 | FZD6     | 1.1096                                                       | Okay     |
| D02 | FZD7     | 1.0905                                                       | Okay     |
| D03 | FZD8     | -1.2311                                                      | B        |
| D04 | GSK3A    | -1.1892                                                      | Okay     |
| D05 | GSK3B    | 1.0353                                                       | Okay     |
| D06 | JUN      | 1.0718                                                       | Okay     |
| D07 | KREMEN1  | 1.5966                                                       | Okay     |
| D08 | LEF1     | -1.1096                                                      | Okay     |
| D09 | LRP5     | -1.1487                                                      | Okay     |
| D10 | LRP6     | 1.0905                                                       | Okay     |
| D11 | MYC      | -1.2746                                                      | Okay     |
| D12 | NKD1     | 1.1096                                                       | Okay     |
| E01 | NLK      | 1.1096                                                       | Okay     |
| E02 | PITX2    | 1.2527                                                       | Okay     |
| E03 | PORCN    | -1.1688                                                      | Okay     |
| E04 | PPP2CA   | -1.0534                                                      | Okay     |
| E05 | PPP2R1A  | -1.1487                                                      | Okay     |
| E06 | PYGO1    | 1.0353                                                       | Okay     |
| E07 | RHOU     | -1.2746                                                      | Okay     |
| E08 | SENP2    | -1.1688                                                      | Okay     |
| E09 | SFRP1    | -1.1892                                                      | B        |
| E10 | SFRP4    | -1.6245                                                      | A        |
| E11 | FBXW4    | 1.0534                                                       | Okay     |
| E12 | SLC9A3R1 | -1.1688                                                      | Okay     |
| F01 | SOX17    | 1.0353                                                       | C        |

**Table W2g.** (continued)

|     |        | Up-regulation/Down-regulation<br>(Compared to Control Group) |          |
|-----|--------|--------------------------------------------------------------|----------|
|     |        | Group 1                                                      |          |
|     |        | Fold Regulation                                              | Comments |
| F02 | T      | 1                                                            | B        |
| F03 | TCF7   | -1.129                                                       | B        |
| F04 | TCF7L1 | 1.4641                                                       | Okay     |
| F05 | TLE1   | 1.1487                                                       | Okay     |
| F06 | TLE2   | -1.129                                                       | B        |
| F07 | WIF1   | -1.2746                                                      | B        |
| F08 | WISP1  | 1.0353                                                       | C        |
| F09 | WNT1   | -1.4389                                                      | B        |
| F10 | WNT10A | -1.7715                                                      | B        |
| F11 | WNT11  | -2.639                                                       | B        |
| F12 | WNT16  | 1.4142                                                       | B        |
| G01 | WNT2   | 1.0353                                                       | C        |
| G02 | WNT2B  | 1.0353                                                       | B        |
| G03 | WNT3   | -1.129                                                       | Okay     |
| G04 | WNT3A  | 1.0353                                                       | C        |
| G05 | WNT4   | -1.7715                                                      | B        |
| G06 | WNT5A  | -1.1892                                                      | Okay     |
| G07 | WNT5B  | -1.1688                                                      | B        |
| G08 | WNT6   | 1.1688                                                       | B        |
| G09 | WNT7A  | 1.0353                                                       | C        |
| G10 | WNT7B  | 1.0353                                                       | C        |
| G11 | WNT8A  | 1.0718                                                       | B        |
| G12 | WNT9A  | 1.0353                                                       | C        |
| H01 | B2M    | -1.366                                                       | Okay     |
| H02 | HPRT1  | -1.2311                                                      | Okay     |
| H03 | RPL13A | 1.1688                                                       | Okay     |
| H04 | GAPDH  | -1.0175                                                      | Okay     |
| H05 | ACTB   | 1.1688                                                       | Okay     |
| H06 | HGDC   | 1.0353                                                       | C        |
| H07 | RTC    | -1.8025                                                      | Okay     |
| H08 | RTC    | -1.8987                                                      | Okay     |
| H09 | RTC    | -1.834                                                       | Okay     |
| H10 | PPC    | -1.4389                                                      | Okay     |
| H11 | PPC    | -1.366                                                       | Okay     |
| H12 | PPC    | -1.3426                                                      | Okay     |

**Comments:**

A: This gene's average threshold cycle is relatively high (>30) in either the control or the test sample and is reasonably low in the other sample (<30).

These data mean that the gene's expression is relatively low in one sample and reasonably detected in the other sample suggesting that the actual fold-change value is at least as large as the calculated and reported fold-change result.

This fold-change result may also have greater variations if  $P > .05$ ; therefore, it is important to have a sufficient number of biologic replicates to validate the result for this gene.

B: This gene's average threshold cycle is relatively high (>30), meaning that its relative expression level is low, in both control and test samples, and the  $P$  value for the fold change is either unavailable or relatively high ( $P > .05$ ).

This fold-change result may also have greater variations; therefore, it is important to have a sufficient number of biologic replicates to validate the result for this gene.

C: This gene's average threshold cycle is either not determined or greater than the defined cutoff value (default 35), in both samples meaning that its expression was undetected, making this fold-change result erroneous and uninterpretable.

**Fold change and fold regulation:**

Fold change ( $2^{-\Delta\Delta C_t}$ ) is the normalized gene expression ( $2^{-\Delta C_t}$ ) in the test sample divided by the normalized gene expression ( $2^{-\Delta C_t}$ ) in the control sample.

Fold regulation represents fold-change results in a biologically meaningful way. Fold-change values greater than 1 indicate a positive or an up-regulation, and the fold regulation is equal to the fold change. Fold-change values less than 1 indicate a negative or down-regulation, and the fold regulation is the negative inverse of the fold change.

Fold-change and fold-regulation values greater than 2 are indicated in red; fold-change values less than 0.5 and fold-regulation values less than -2 are indicated in blue.



**Table W3.**  $\beta$ -Catenin Mutational Status in Hepatoblastoma Specimens.

| Sample | Histology | Mutational Status | CITED1 Densitometry | $\beta$ -Catenin Densitometry |
|--------|-----------|-------------------|---------------------|-------------------------------|
| 1      | 2         | 2                 | 40.73               | 1.15                          |
| 2      | 1         | 2                 | 28.97               | 1.28                          |
| 3      | 2         | ND                | 27.79               | 0.61                          |
| 4      | 2         | ND                | 40.36               | 0.56                          |
| 5      | 1         | 1                 | 39.13               | 0.2                           |
| 6      | 2         | 2                 | 19.84               | 0.4                           |
| 7      | 1         | 1                 | 31.18               | 0.63                          |
| 8      | 1         | 2                 | 7.14                | 0.34                          |
| 9      | 2         | 1                 | 52.66               | 0.56                          |
| 10     | 1         | 1                 | ND                  | 1.77                          |
| 11     | 1         | ND                | 40.27               | 1.42                          |
| 12     | 2         | 2                 | 43.9                | 1.47                          |
| 13     | 2         | 2                 | 63.69               | 1.02                          |
| 14     | 2         | ND                | 47.42               | 1.29                          |
| 15     | 1         | 1                 | 9.78                | 0.28                          |
| 16     | 1         | 2                 | 42.78               | 1.7                           |
| 17     | 2         | 2                 | 40.82               | 1.58                          |
| 18     | 2         | 2                 | 18.07               | ND                            |
| 19     | 2         | 2                 | 41.59               | 0.42                          |

Histology 1, fetal; histology 2, EMEF; mutational status 1, wild type; mutational status 2, mutant; ND, not determined.

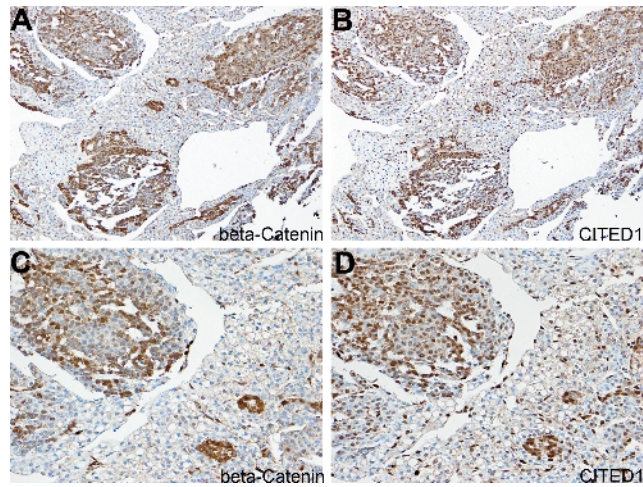

**Figure W1.** Serial sections immunohistochemically stained for  $\beta$ -catenin and CITED1 reveal expression in similar cell populations (serial sections A and B: original magnification,  $\times 200$ ; serial sections C and D: original magnification,  $\times 400$ ).
